# Supplementary material for: Ancient Mitogenomes Provide New Insights into the Origin and Early Introduction of Chinese Domestic Donkeys
Source: Frontiers journal article supplement (doi:10.3389/fgene.2021.759831), 2021-10-15
Supplement: Data_Sheet_2.PDF [file Data_Sheet_2.PDF]

SG1

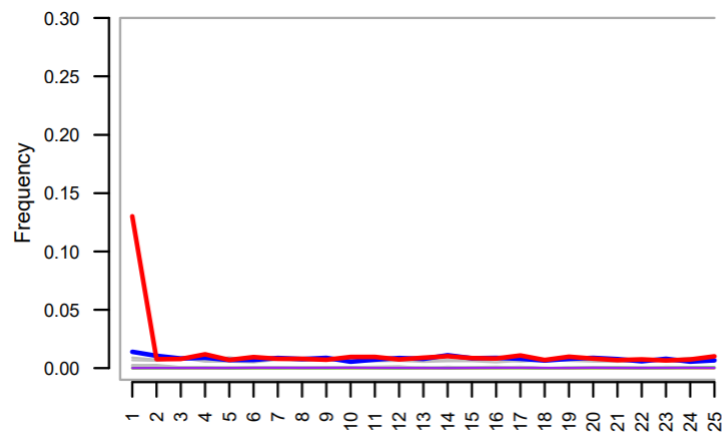

SG3

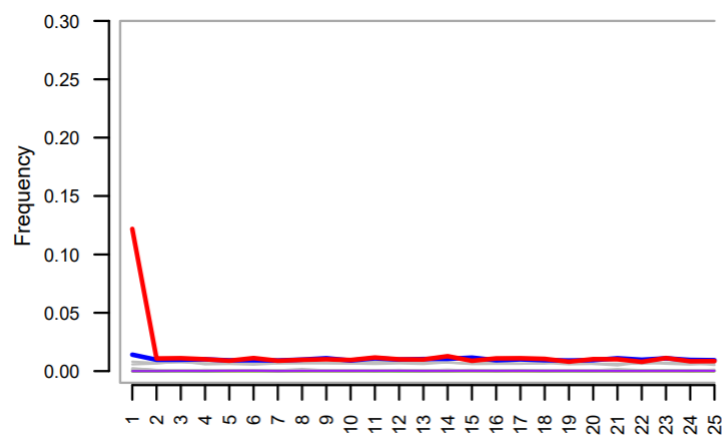

LXH1

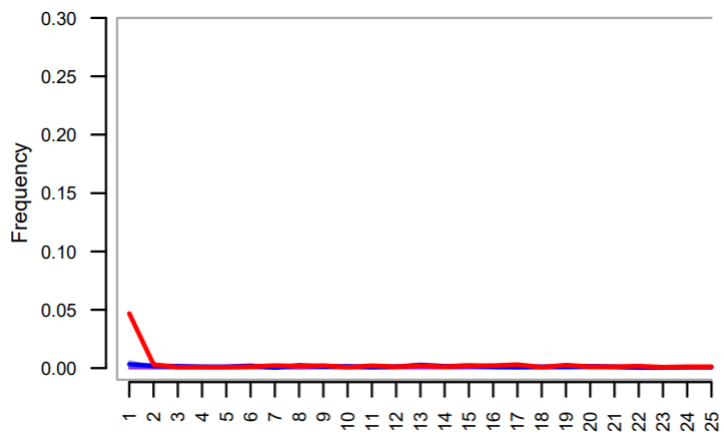

**Supplementary Figure 1** Cytosine deamination frequency inferred from three donkey remains analyzed in this study. Red lines show the rates of C to T substitutions for the first 25 bases of the 5' end of the fragments that could be mapped to the donkey mitochondrial genome.
